# Supplementary material for: Safety of the Breast Cancer Adjuvant Radiotherapy in Ataxia–Telangiectasia Mutated Variant Carriers
Source: MDPI journal article supplement (doi:10.3390/cancers16071417), 2024-04-05
Supplement: s1 [file s1]

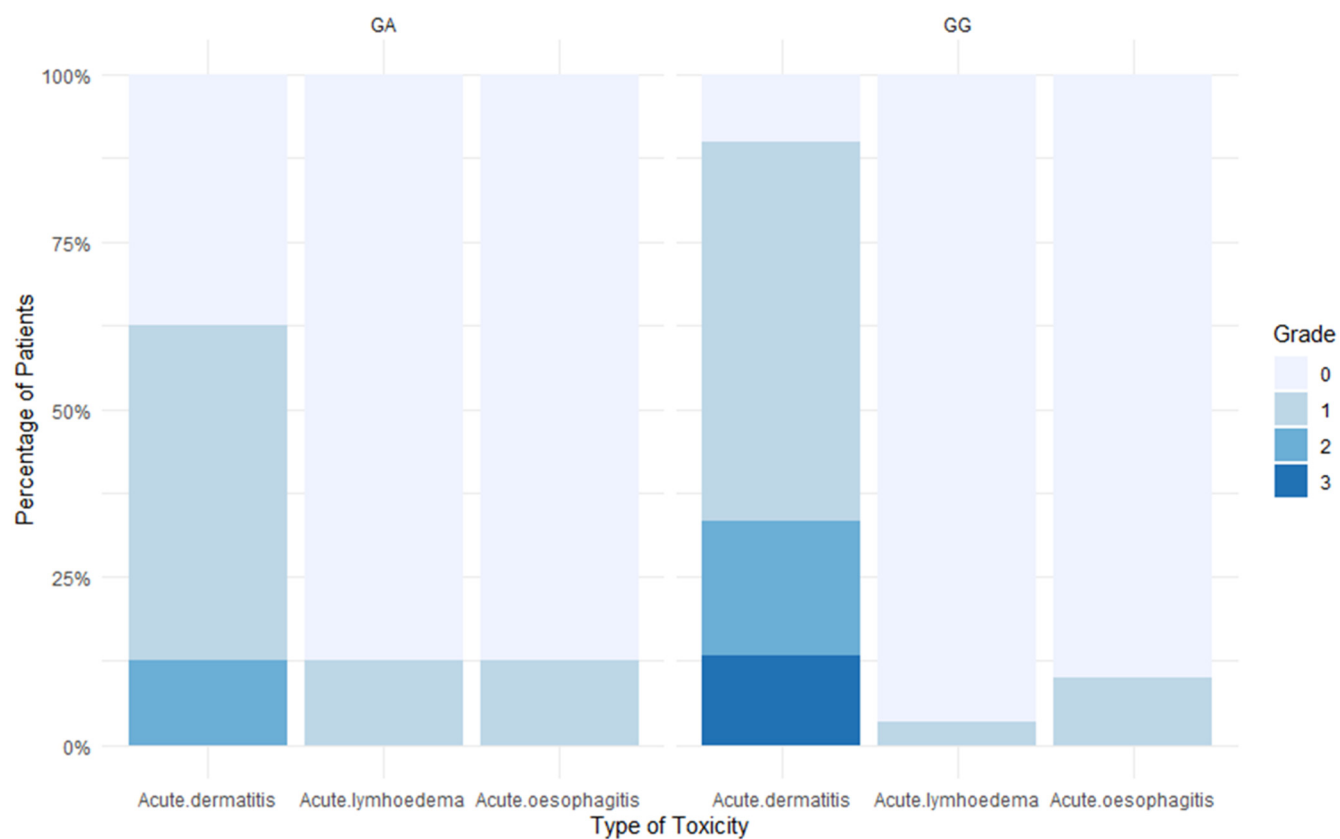

**Figure S1.** Acute toxicities in carriers and noncarriers of allele A of SNP rs1801516.

Abbreviations: GA: patients with genotype GA for SNP rs1801516, GG: patients with genotype GG for SNP rs1801516.

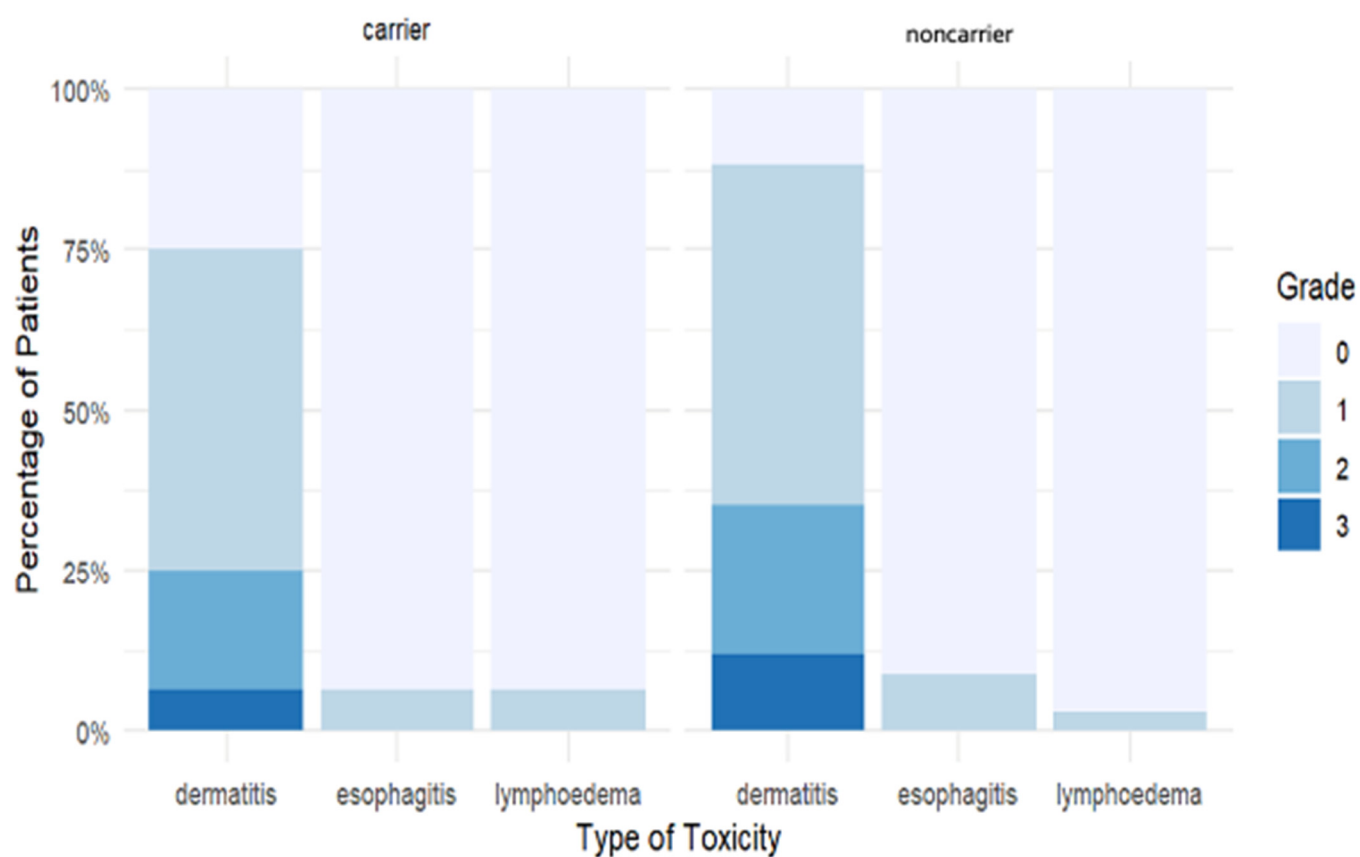

**Figure S2.** Acute toxicities between in carriers and noncarriers of a rare monoallelic *ATM* PV or predicted PV and/or of allele A of SNP rs1801516.

Abbreviations: Carriers : patients with rare monoallelic *ATM* PV or predicted PV and/or of allele A of SNP rs1801516. Non-carrier: patient with no *ATM* variant.

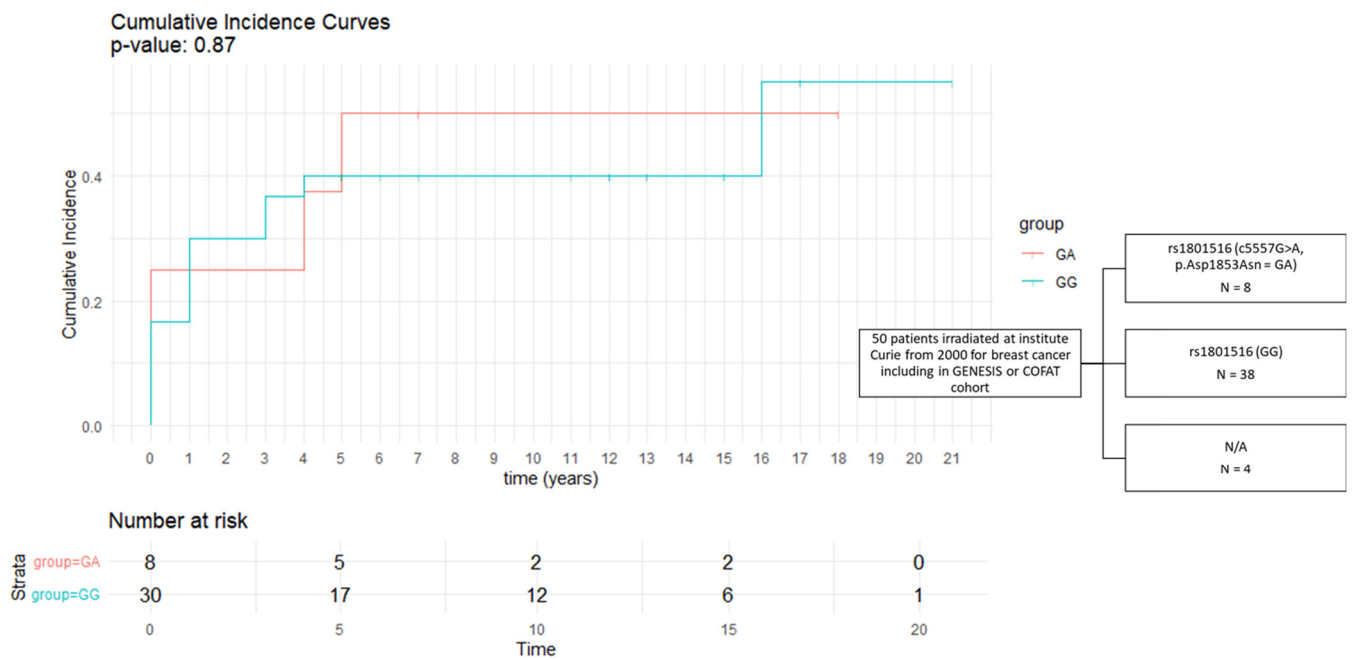

**Figure S3.** Incidence curve of late subcutaneous fibrosis according to genotype for SNP rs1801516.

Abbreviations: GA: patients with genotype rs1801516-GA, GG: patients with genotype rs1801516-GG, N/A: Not Available

## Cumulative Incidence Curves

p-value: 0.67

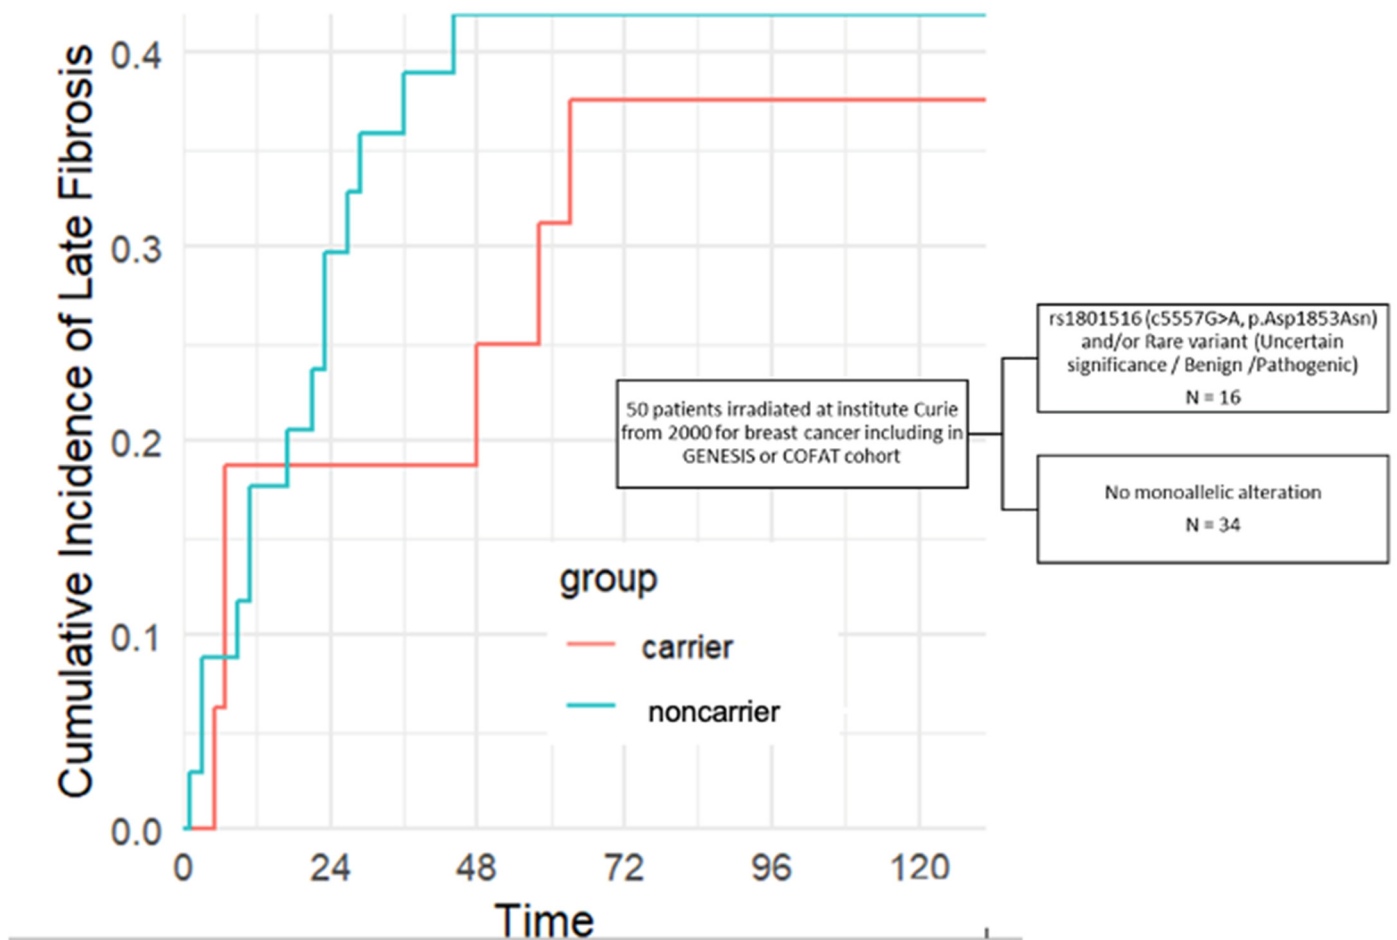

**Figure S4.** Incidence curve of late subcutaneous fibrosis in carriers and noncarriers of a rare monoallelic *ATM* PV or predicted PV and/or of allele A of SNP rs1801516.

Abbreviations: Carriers: patients with a rare monoallelic *ATM* PV or predicted PV and/or of allele A of SNP rs1801516. Non-carrier: patients with no *ATM* variant.
